# Supplementary material for: Phylogeography And Genomic Epidemiology of SARS-CoV-2 In Italy And Europe With Newly Characterized Italian Genomes
Source: Research Square preprint supplement (doi:10.21203/rs.3.rs-763359/v1), 2021-08-16
Supplement: Supplementary file 1 [file 0273007797dbc44bd85e9bd0.docx]

**SUPPLEMENTARY INFORMATION**

| **Accession ID** | **Sampling Date** |
| --- | --- |
| EPI_ISL_569865 | 20/02/2020 |
| EPI_ISL_569868 | 03/03/2020 |
| EPI_ISL_569869 | 01/03/2020 |
| EPI_ISL_569870 | 01/03/2020 |
| EPI_ISL_569871 | 01/03/2020 |
| EPI_ISL_569872 | 01/03/2020 |
| EPI_ISL_569873 | 24/02/2020 |
| EPI_ISL_569874 | 24/02/2020 |
| EPI_ISL_569875 | 24/02/2020 |
| EPI_ISL_569876 | 03/03/2020 |
| EPI_ISL_569877 | 01/03/2020 |
| EPI_ISL_569878 | 28/02/2020 |
| EPI_ISL_569879 | 04/03/2020 |
| EPI_ISL_569880 | 14/03/2020 |
| EPI_ISL_569881 | 14/03/2020 |
| EPI_ISL_569882 | 17/03/2020 |
| EPI_ISL_569883 | 14/03/2020 |
| EPI_ISL_569884 | 14/03/2020 |
| EPI_ISL_569885 | 16/03/2020 |
| EPI_ISL_569886 | 17/03/2020 |
| EPI_ISL_525553 | 23/03/2020 |
| EPI_ISL_525556 | 23/03/2020 |
| EPI_ISL_525557 | 18/03/2020 |
| EPI_ISL_525558 | 19/03/2020 |
| EPI_ISL_525568 | 19/03/2020 |
| EPI_ISL_525573 | 19/03/2020 |
| EPI_ISL_525574 | 21/03/2020 |
| EPI_ISL_527380 | 23/03/2020 |
| EPI_ISL_412973 | 23/03/2020 |
| EPI_ISL_413489 | 23/03/2020 |
| EPI_ISL_417418 | 23/03/2020 |
| EPI_ISL_417419 | 25/03/2020 |
| EPI_ISL_417421 | 25/03/2020 |
| EPI_ISL_417423 | 07/03/2020 |
| EPI_ISL_417445 | 23/03/2020 |
| EPI_ISL_417446 | 04/03/2020 |
| EPI_ISL_417447 | 30/03/2020 |
| EPI_ISL_417491 | 30/03/2020 |
| EPI_ISL_417921 | 17/03/2020 |
| EPI_ISL_417922 | 17/03/2020 |
| EPI_ISL_417923 | 20/03/2020 |
| EPI_ISL_418255 | 21/03/2020 |
| EPI_ISL_418256 | 24/03/2020 |
| EPI_ISL_418257 | 24/03/2020 |
| EPI_ISL_418258 | 24/03/2020 |
| EPI_ISL_418259 | 24/03/2020 |
| EPI_ISL_418260 | 24/03/2020 |
| EPI_ISL_418261 | 24/03/2020 |
| EPI_ISL_419254 | 28/03/2020 |
| EPI_ISL_419255 | 24/03/2020 |
| EPI_ISL_420563 | 07/04/2020 |
| EPI_ISL_420564 | 08/04/2020 |
| EPI_ISL_420565 | 08/04/2020 |
| EPI_ISL_420566 | 08/04/2020 |
| EPI_ISL_420567 | 08/04/2020 |
| EPI_ISL_420568 | 08/04/2020 |
| EPI_ISL_420569 | 09/04/2020 |
| EPI_ISL_420583 | 09/04/2020 |
| EPI_ISL_420592 | 09/04/2020 |
| EPI_ISL_422437 | 09/04/2020 |
| EPI_ISL_422438 | 19/03/2020 |
| EPI_ISL_424342 | 20/03/2020 |
| EPI_ISL_424343 | 20/03/2020 |
| EPI_ISL_424344 | 20/03/2020 |
| EPI_ISL_428853 | 20/03/2020 |
| EPI_ISL_428854 | 20/03/2020 |
| EPI_ISL_429226 | 21/03/2020 |
| EPI_ISL_429227 | 27/04/2020 |
| EPI_ISL_429228 | 27/04/2020 |
| EPI_ISL_429229 | 27/04/2020 |
| EPI_ISL_429230 | 27/04/2020 |
| EPI_ISL_429231 | 27/04/2020 |
| EPI_ISL_429232 | 27/04/2020 |
| EPI_ISL_429233 | 26/04/2020 |
| EPI_ISL_429234 | 27/04/2020 |
| EPI_ISL_429235 | 04/03/2020 |
| EPI_ISL_429236 | 23/03/2020 |
| EPI_ISL_435145 | 23/03/2020 |
| EPI_ISL_435146 | 21/02/2020 |
| EPI_ISL_435147 | 21/02/2020 |
| EPI_ISL_435148 | 01/03/2020 |
| EPI_ISL_435149 | 01/03/2020 |
| EPI_ISL_435150 | 14/03/2020 |
| EPI_ISL_435151 | 20/03/2020 |
| EPI_ISL_435152 | 22/03/2020 |
| EPI_ISL_435153 | 23/03/2020 |
| EPI_ISL_435154 | 24/03/2020 |
| EPI_ISL_435155 | 24/03/2020 |
| EPI_ISL_436718 | 26/03/2020 |
| EPI_ISL_436719 | 28/03/2020 |
| EPI_ISL_436720 | 31/03/2020 |
| EPI_ISL_436721 | 31/03/2020 |
| EPI_ISL_436722 | 01/04/2020 |
| EPI_ISL_436723 | 03/04/2020 |
| EPI_ISL_436724 | 03/04/2020 |
| EPI_ISL_436725 | 01/03/2020 |
| EPI_ISL_436726 | 22/02/2020 |
| EPI_ISL_436727 | 06/03/2020 |
| EPI_ISL_436728 | 12/03/2020 |
| EPI_ISL_436729 | 15/03/2020 |
| EPI_ISL_436730 | 04/03/2020 |
| EPI_ISL_436731 | 14/03/2020 |
| EPI_ISL_436732 | 24/03/2020 |
| EPI_ISL_451303 | 27/02/2020 |
| EPI_ISL_451304 | 25/03/2020 |
| EPI_ISL_451305 | 08/03/2020 |
| EPI_ISL_451306 | 03/04/2020 |
| EPI_ISL_451307 | 12/04/2020 |
| EPI_ISL_451308 | 22/02/2020 |
| EPI_ISL_451309 | 28/02/2020 |
| EPI_ISL_451961 | 24/02/2020 |
| EPI_ISL_451962 | 26/02/2020 |
| EPI_ISL_452181 | 26/02/2020 |
| EPI_ISL_452182 | 29/02/2020 |
| EPI_ISL_452183 | 01/03/2020 |
| EPI_ISL_452184 | 24/02/2020 |
| EPI_ISL_452185 | 26/02/2020 |
| EPI_ISL_452186 | 26/02/2020 |
| EPI_ISL_452187 | 26/02/2020 |
| EPI_ISL_452188 | 28/02/2020 |
| EPI_ISL_452189 | 22/02/2020 |
| EPI_ISL_452190 | 28/02/2020 |
| EPI_ISL_452191 | 29/02/2020 |
| EPI_ISL_454733 | 25/02/2020 |
| EPI_ISL_457699 | 26/02/2020 |
| EPI_ISL_457700 | 18/03/2020 |
| EPI_ISL_457721 | 18/03/2020 |
| EPI_ISL_457724 | 19/03/2020 |
| EPI_ISL_457728 | 20/03/2020 |
| EPI_ISL_457732 | 19/03/2020 |
| EPI_ISL_457736 | 20/03/2020 |
| EPI_ISL_457749 | 20/03/2020 |
| EPI_ISL_457825 | 20/03/2020 |
| EPI_ISL_457826 | 16/03/2020 |
| EPI_ISL_458084 | 07/04/2020 |
| EPI_ISL_458085 | 06/04/2020 |
| EPI_ISL_460079 | 03/04/2020 |
| EPI_ISL_460080 | 20/03/2020 |
| EPI_ISL_460081 | 23/03/2020 |
| EPI_ISL_460082 | 23/03/2020 |
| EPI_ISL_460083 | 23/03/2020 |
| EPI_ISL_460084 | 20/03/2020 |
| EPI_ISL_460085 | 19/03/2020 |
| EPI_ISL_460086 | 30/05/2020 |
| EPI_ISL_460087 | 27/03/2020 |
| EPI_ISL_460088 | 27/03/2020 |
| EPI_ISL_460089 | 12/04/2020 |
| EPI_ISL_460090 | 12/04/2020 |
| EPI_ISL_460091 | 13/04/2020 |
| EPI_ISL_460092 | 08/03/2020 |
| EPI_ISL_460093 | 09/03/2020 |
| EPI_ISL_460094 | 02/03/2020 |
| EPI_ISL_460095 | 02/03/2020 |
| EPI_ISL_468914 | 13/03/2020 |
| EPI_ISL_469016 | 17/03/2020 |
| EPI_ISL_469018 | 24/03/2020 |
| EPI_ISL_469019 | 02/04/2020 |
| EPI_ISL_469020 | 20/03/2020 |
| EPI_ISL_469021 | 04/04/2020 |
| EPI_ISL_469022 | 02/04/2020 |
| EPI_ISL_469023 | 20/02/2020 |
| EPI_ISL_477194 | 26/02/2020 |
| EPI_ISL_477195 | 01/04/2020 |
| EPI_ISL_477196 | 22/02/2020 |
| EPI_ISL_477197 | 23/02/2020 |
| EPI_ISL_477198 | 02/03/2020 |
| EPI_ISL_477199 | 02/03/2020 |
| EPI_ISL_477200 | 06/03/2020 |
| EPI_ISL_477201 | 26/02/2020 |
| EPI_ISL_477202 | 03/03/2020 |
| EPI_ISL_477203 | 04/04/2020 |
| EPI_ISL_477204 | 18/03/2020 |
| EPI_ISL_479616 | 07/04/2020 |
| EPI_ISL_479617 | 07/04/2020 |
| EPI_ISL_479618 | 18/04/2020 |
| EPI_ISL_479619 | 11/03/2020 |
| EPI_ISL_479790 | 08/03/2020 |
| EPI_ISL_479791 | 10/03/2020 |
| EPI_ISL_486646 | 05/03/2020 |
| EPI_ISL_486647 | 15/03/2020 |
| EPI_ISL_486648 | 04/03/2020 |
| EPI_ISL_486649 | 10/05/2020 |
| EPI_ISL_486650 | 07/05/2020 |
| EPI_ISL_486651 | 28/03/2020 |
| EPI_ISL_486652 | 28/03/2020 |
| EPI_ISL_486653 | 17/03/2020 |
| EPI_ISL_486654 | 16/03/2020 |
| EPI_ISL_486655 | 16/03/2020 |
| EPI_ISL_486656 | 17/03/2020 |
| EPI_ISL_486657 | 09/04/2020 |
| EPI_ISL_486658 | 11/04/2020 |
| EPI_ISL_486659 | 27/03/2020 |
| EPI_ISL_486660 | 08/04/2020 |
| EPI_ISL_486661 | 10/04/2020 |
| EPI_ISL_486662 | 08/04/2020 |
| EPI_ISL_486663 | 01/04/2020 |
| EPI_ISL_486664 | 31/03/2020 |
| EPI_ISL_486665 | 31/03/2020 |
| EPI_ISL_487276 | 31/03/2020 |
| EPI_ISL_492980 | 31/03/2020 |
| EPI_ISL_492981 | 31/03/2020 |
| EPI_ISL_492982 | 31/03/2020 |
| EPI_ISL_492983 | 31/03/2020 |
| EPI_ISL_492984 | 31/03/2020 |
| EPI_ISL_492985 | 31/03/2020 |
| EPI_ISL_492986 | 01/04/2020 |
| EPI_ISL_492987 | 01/04/2020 |
| EPI_ISL_493328 | 31/03/2020 |
| EPI_ISL_493329 | 01/04/2020 |
| EPI_ISL_493330 | 01/04/2020 |
| EPI_ISL_493331 | 08/04/2020 |
| EPI_ISL_493332 | 08/04/2020 |
| EPI_ISL_493333 | 08/04/2020 |
| EPI_ISL_496482 | 08/04/2020 |

**Supplementary Table 1. Accession IDs and sampling dates of sequences included in the dataset**


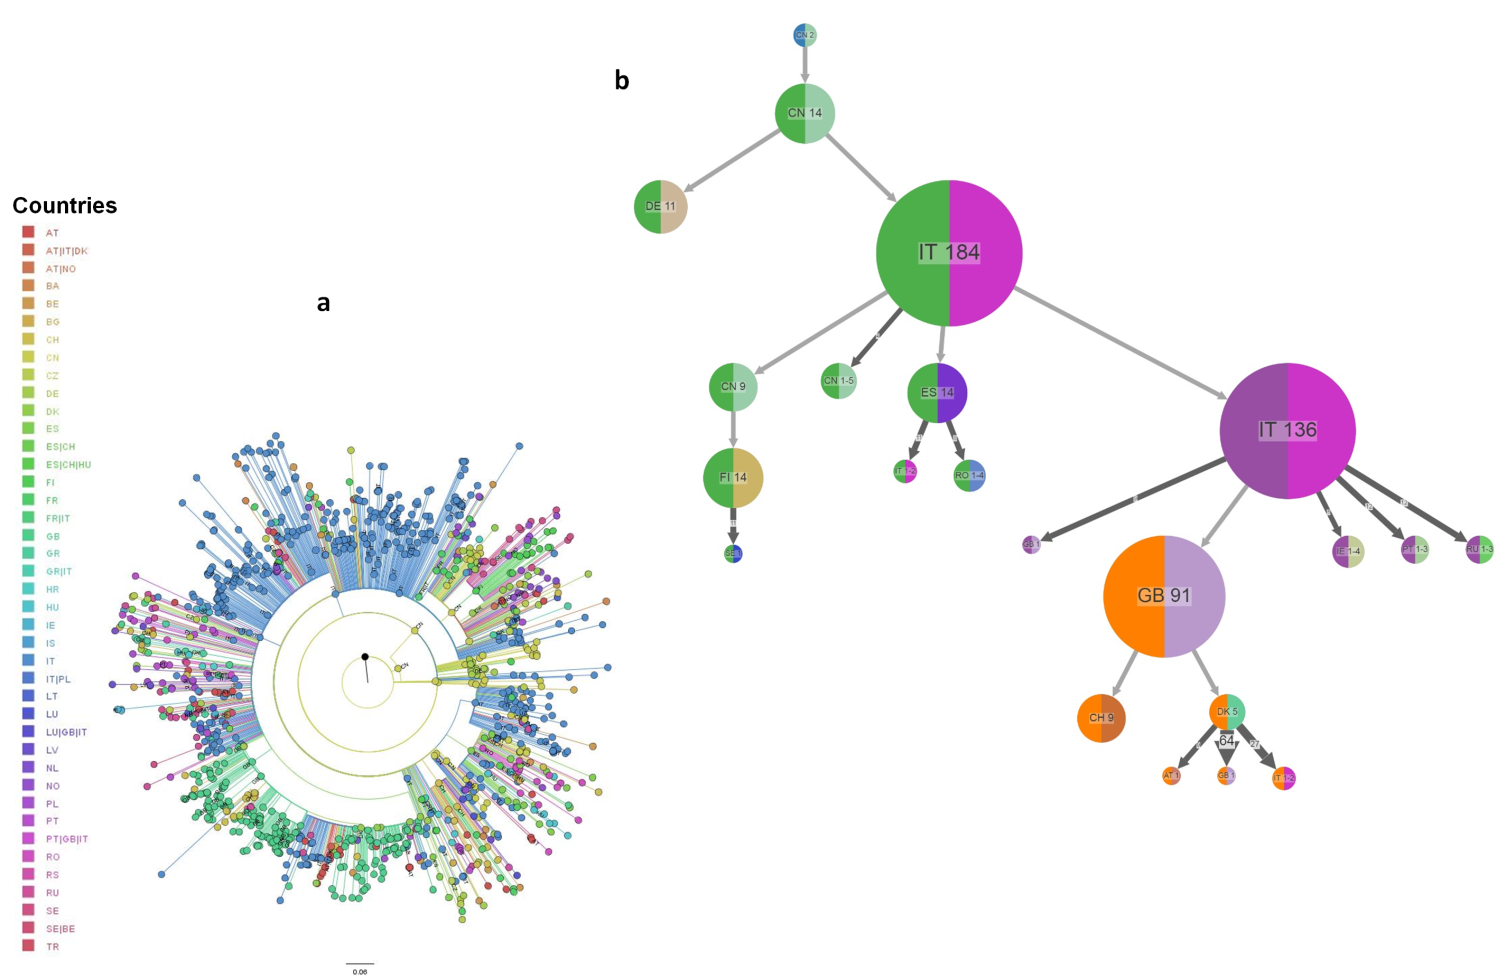


**Supplementary Figure 1. Ancestral reconstruction of SARS-CoV-2 lineages B.1 using the European dataset.** **a**, **b**, The figure shows the full tree (**a**) and compressed visualization produced by PastML (**b**) using marginal posterior probability approximation (MPPA) with an F81-like model. Different colours correspond to different European countries and lineages. Numbers inside (or next to) the circles indicate the number of strains assigned to the specific node. AT, Austria; IT, Italy; DK, Denmark; NO, Norway; BA, Bosnia and Herzegovina; BE, Belgium; BG, Bulgaria; CH, Swiss; CN, China; CZ, Czech Republic; DE, Germany; ES, Spain; HU, Hungary; FI, Finland; FR, France; GB, United Kingdom; GR, Greece; HR, Croatia; IE, Ireland; IS, Iceland; PL, Poland; LT, Lithuania; LU, Luxembourg; LV, Latvia; NL, Netherlands; PT, Portugal; RO, Romania; RS, Serbia; RU, Russia; SE, Sweden; TR, Turkey.


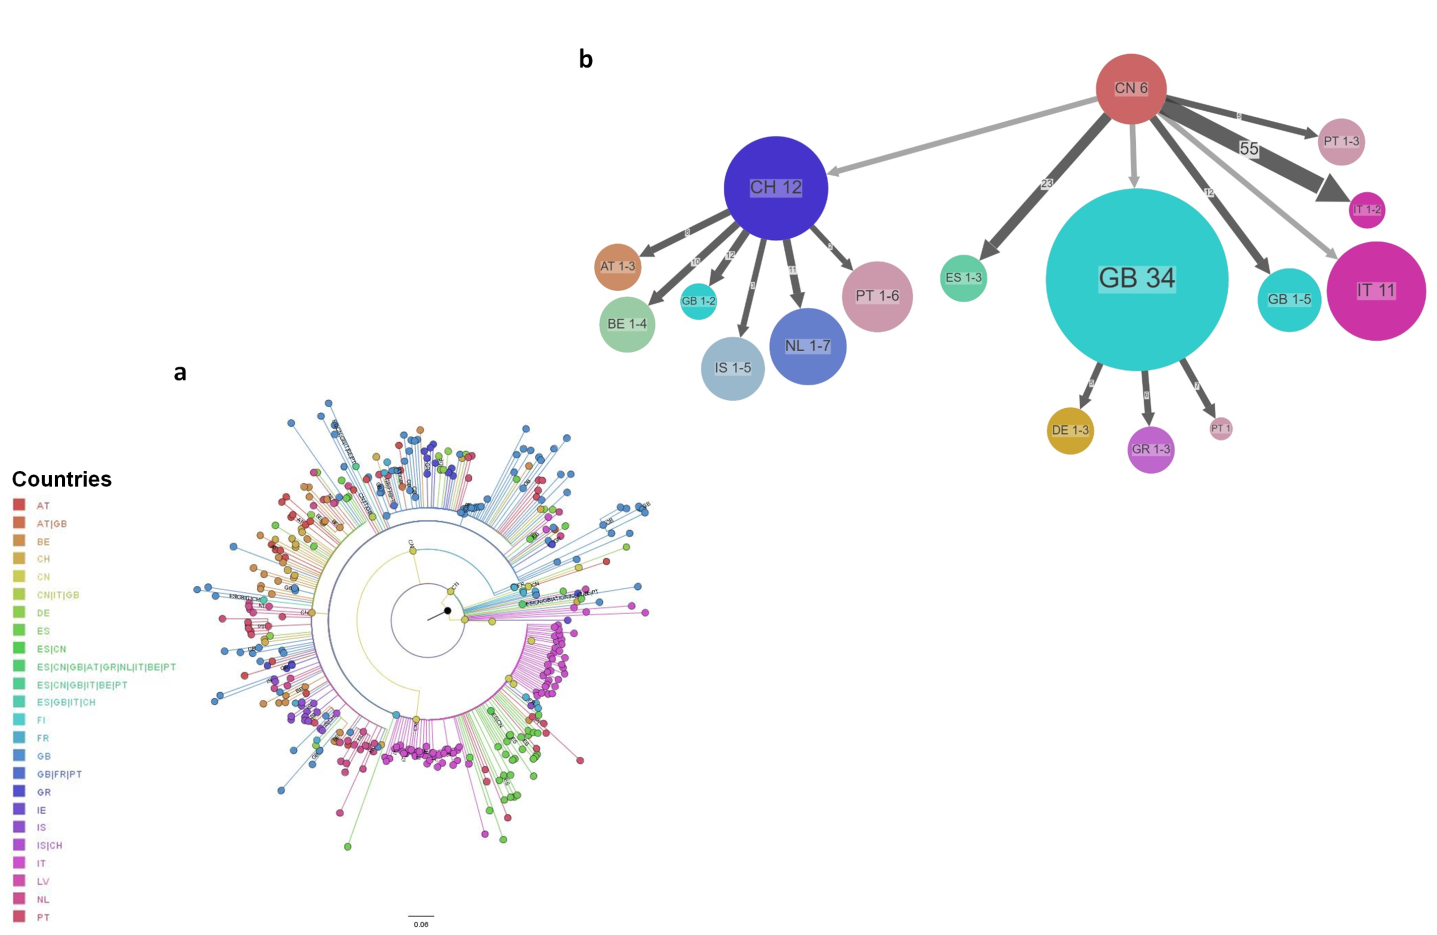


**Supplementary Figure 2.** **Ancestral reconstruction of SARS-CoV-2 lineages B using European dataset.** **a**, **b**, The figure shows the full tree (**a**) and compressed visualization produced by PastML (**b**) using marginal posterior probability approximation (MPPA) with an F81-like model. Different colours correspond to different European countries and lineages. Numbers inside (or next to) the circles indicate the number of strains assigned to the specific node. AT, Austria; GB, United Kingdom; BE, Belgium; CH, Swiss; CN, China; IT, Italy; DE, Germany; ES, Spain; GR, Greece; NL, Netherlands; PT, Portugal; FI, Finland; FR, France; IE, Ireland; IS, Iceland; LV, Latvia.
